# Supplementary material
Source: PubMed Central journal article supplement (PMC4153738)
Supplement: NIHMS620020-supplement-02.pdf [file NIHMS620020-supplement-02.pdf]

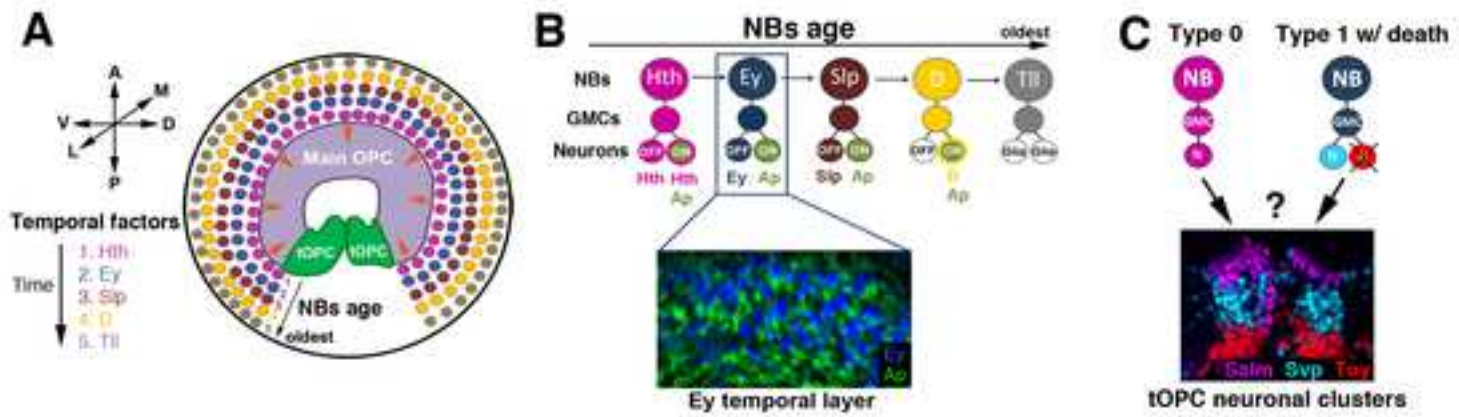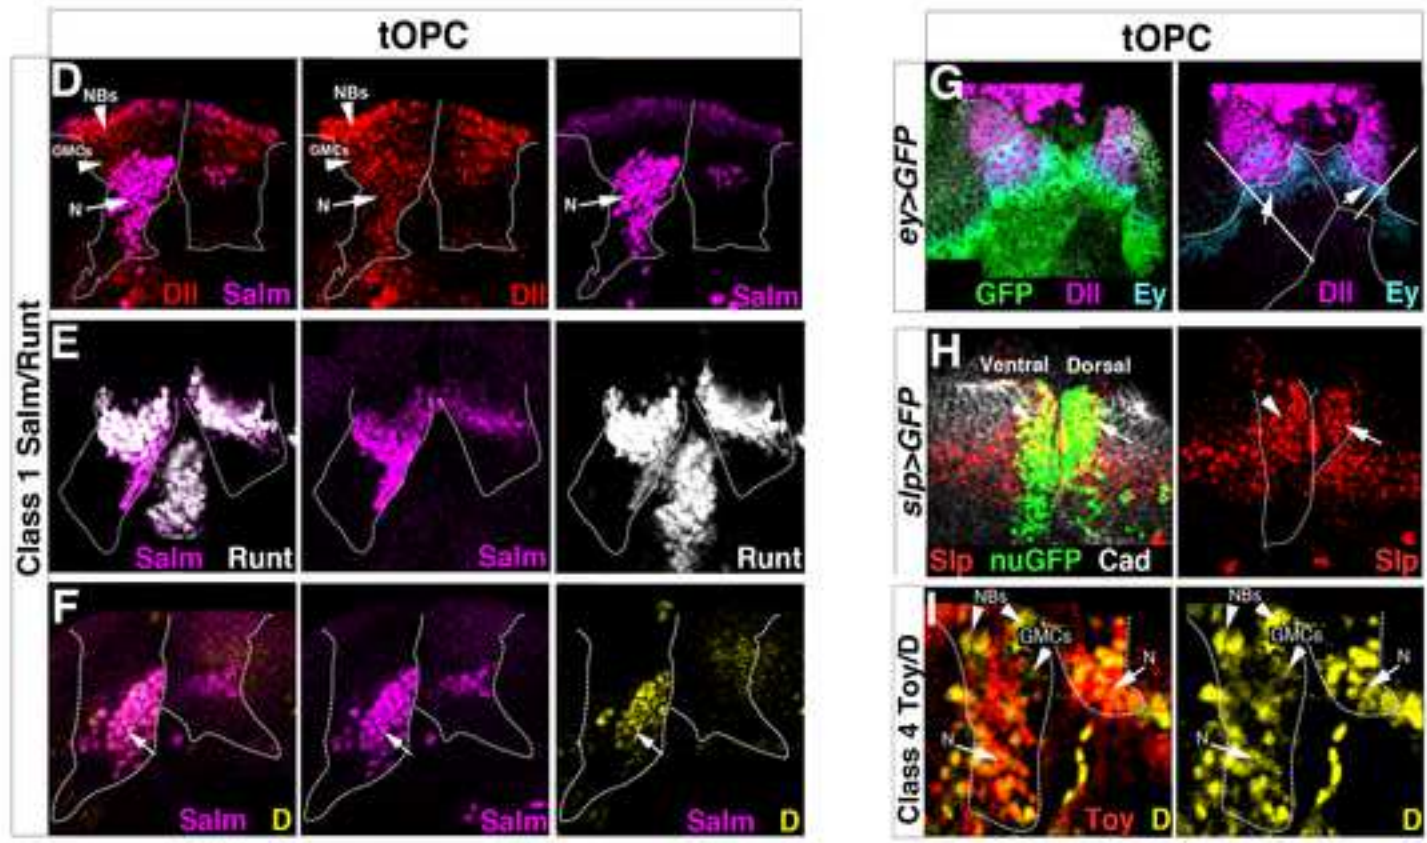

Figure S1, Bertet et al.

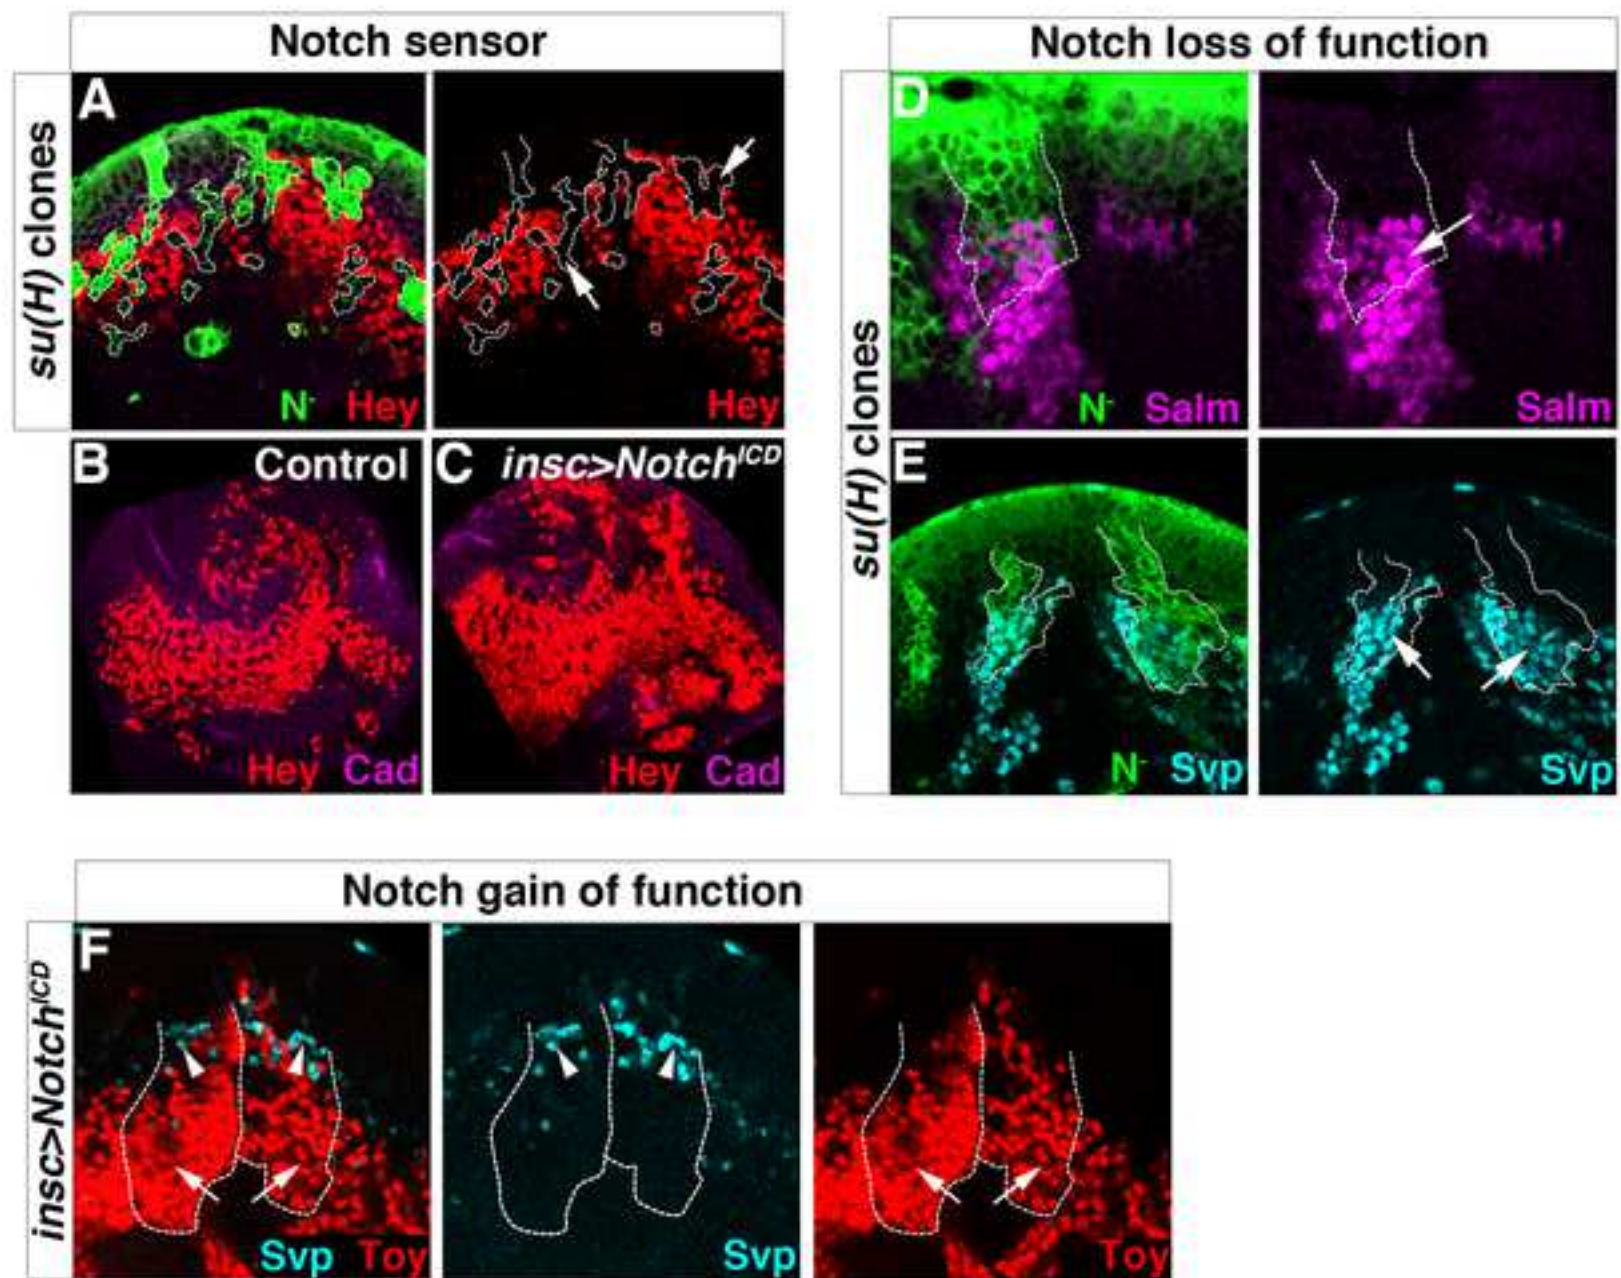

Figure S2, Bertet et al.



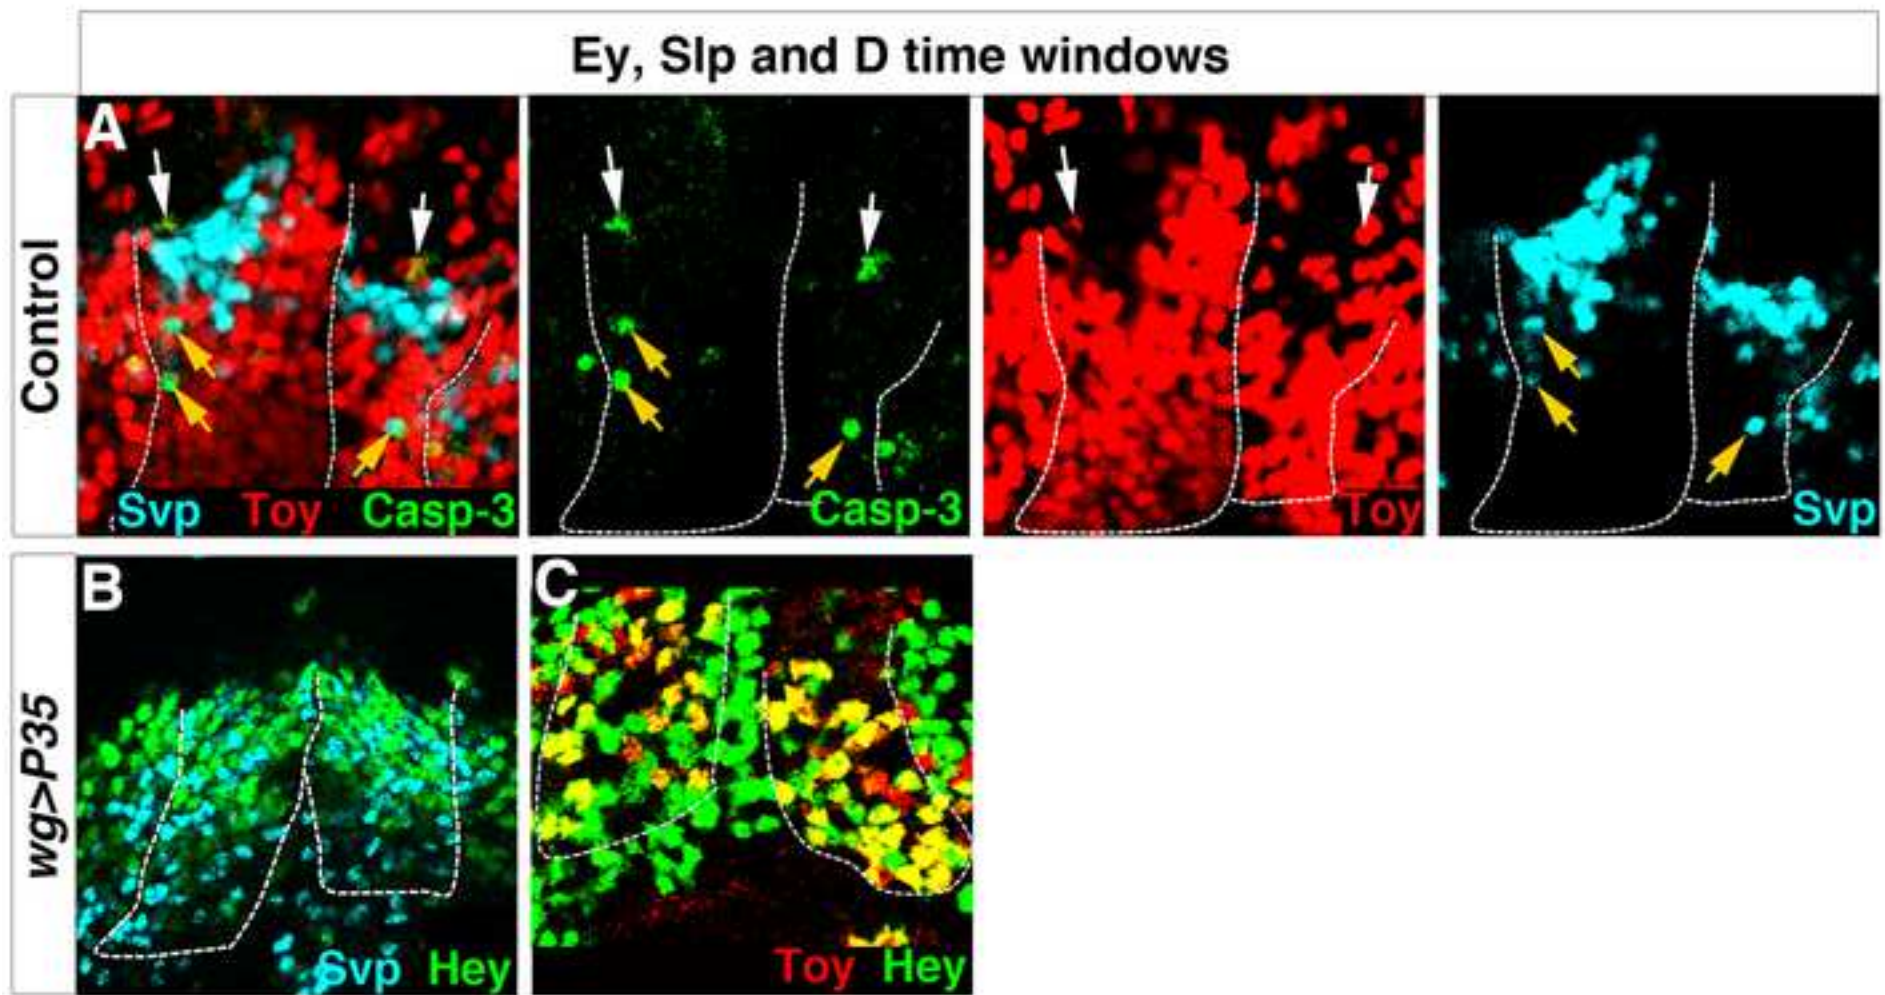

**Figure S3, Bertet et al.**

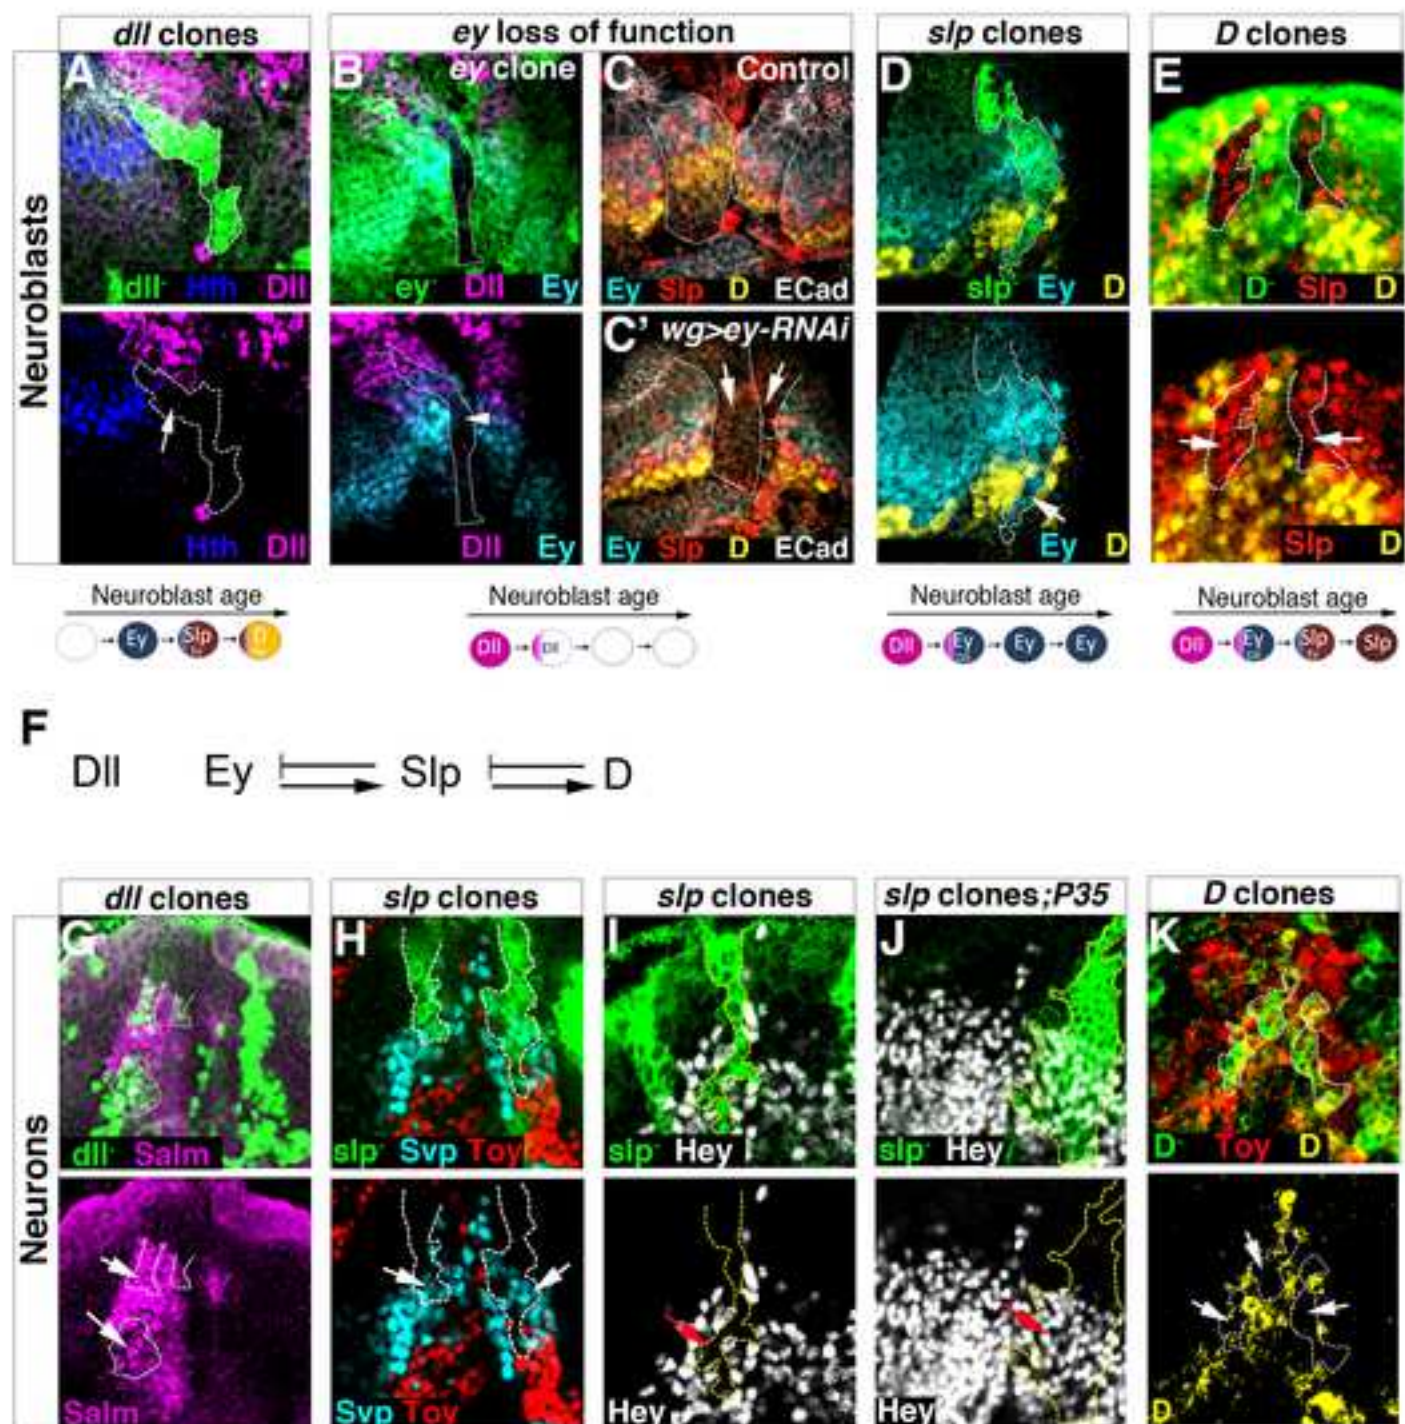

Figure S4, Bertet et al.



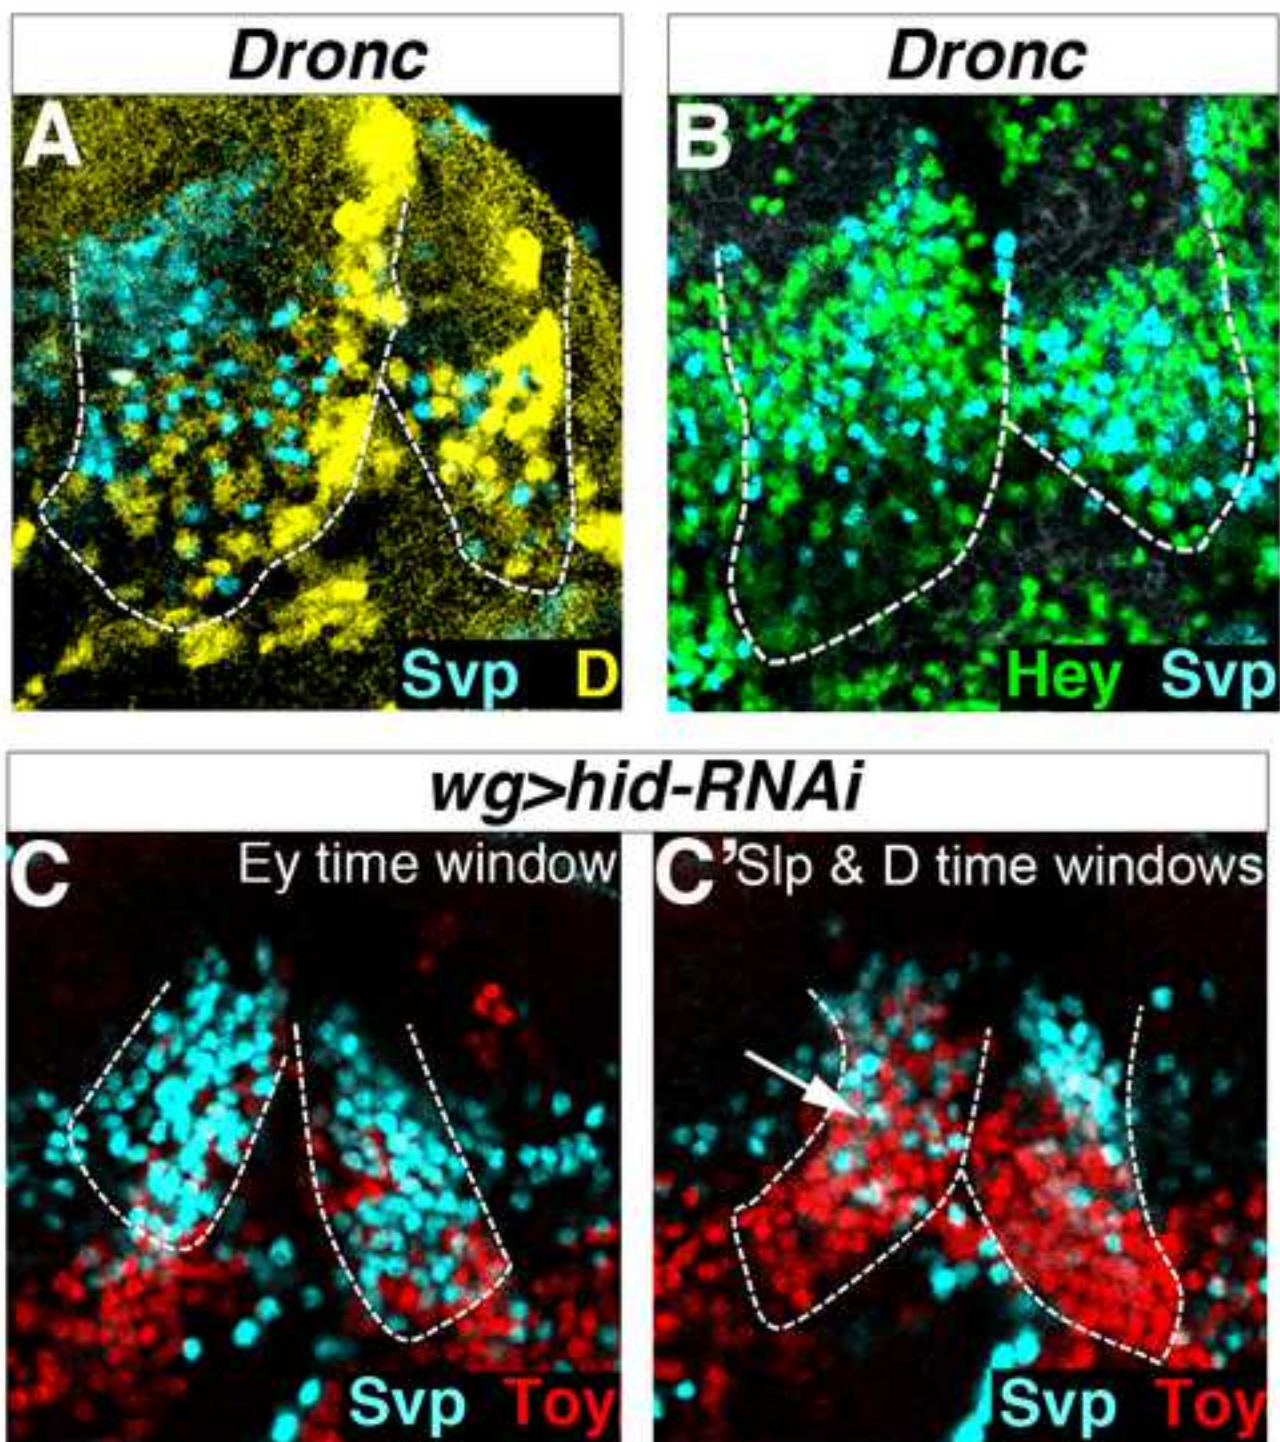

**Figure S5, Bertet et al.**

**A LARVAL OPTIC LOBE**

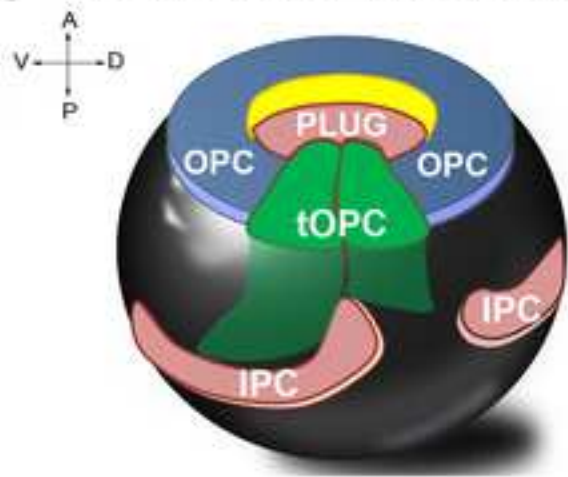

**ADULT OPTIC LOBE**

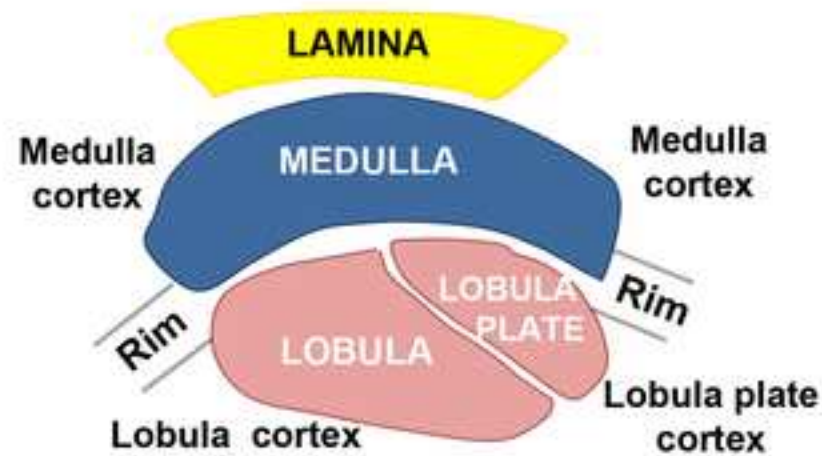

**B *wg-gal4* FLEXAMP**

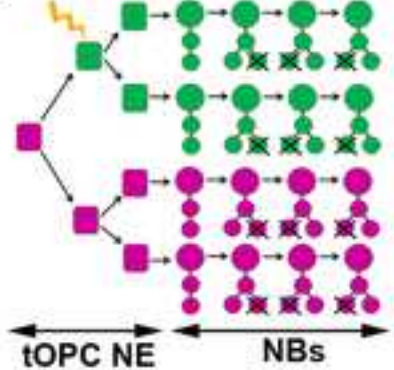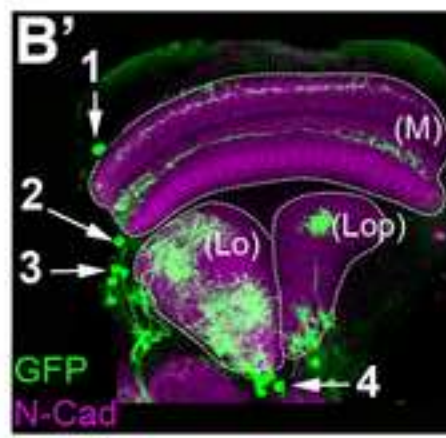

**C *slp-gal4* FLEXAMP**

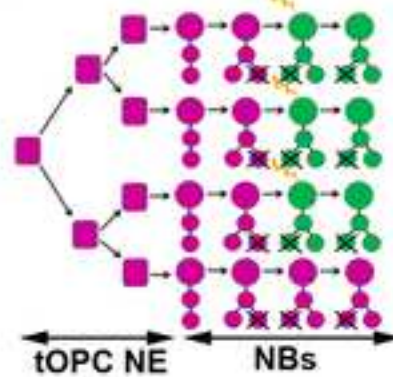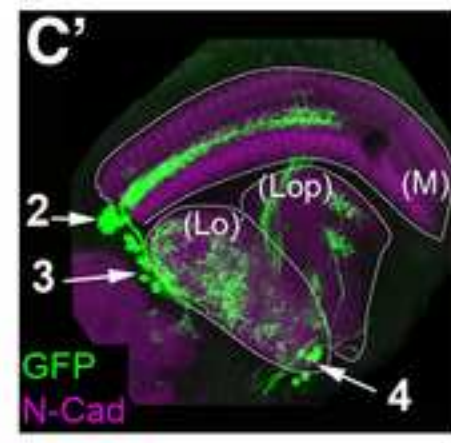

**Figure S6, Bertet et al.**



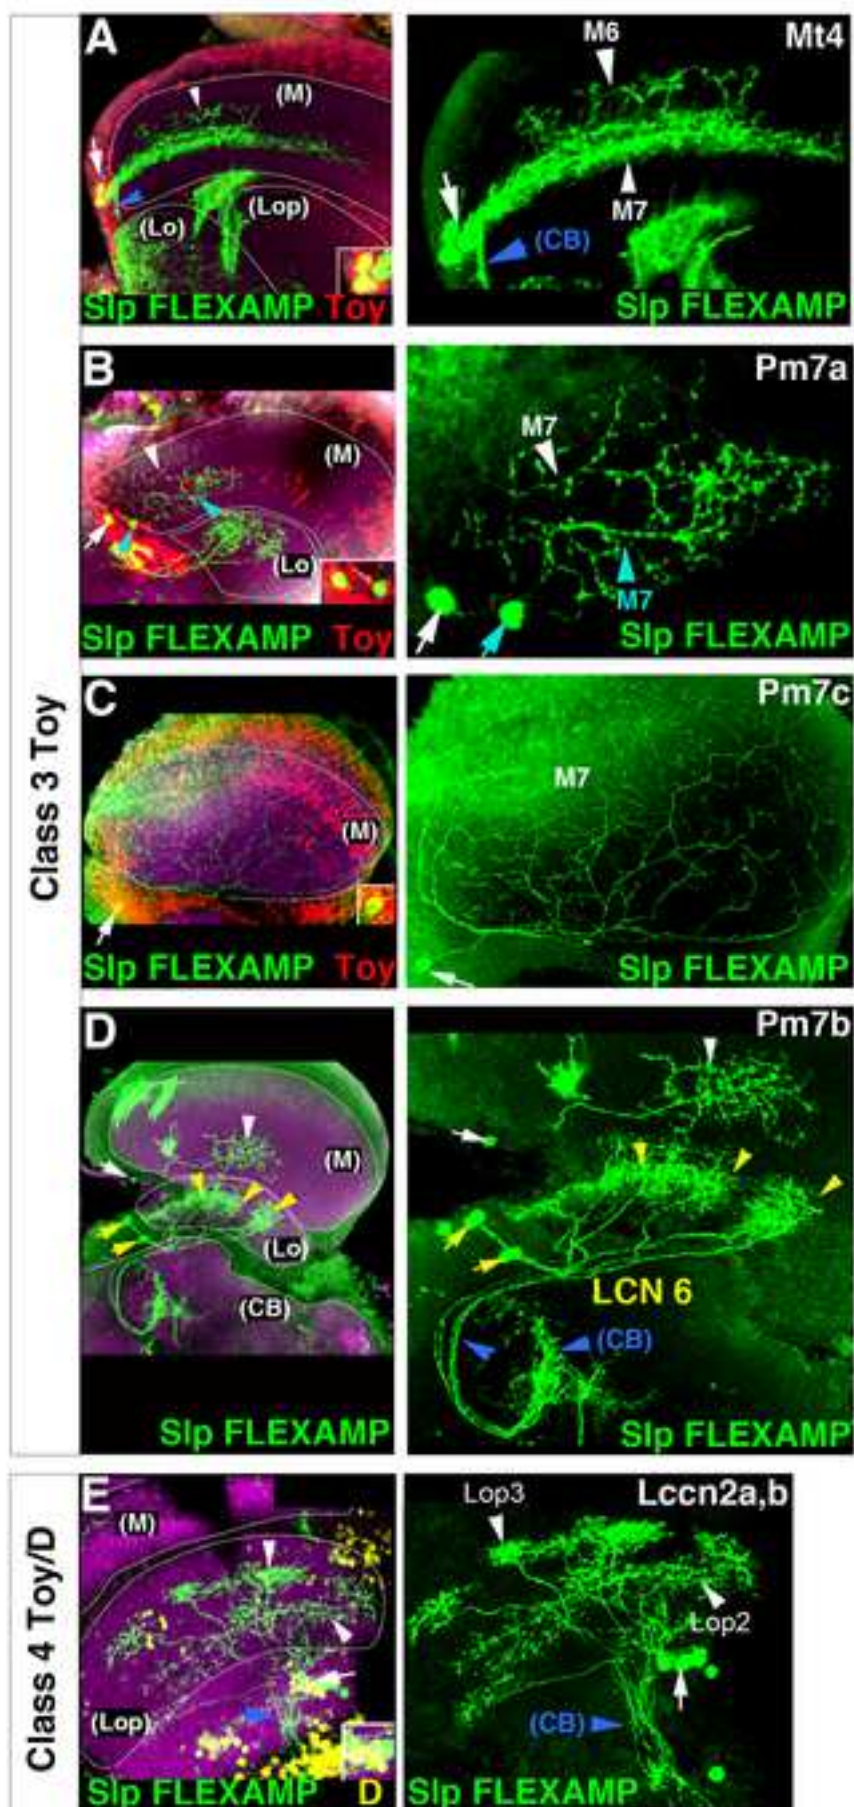

Figure S7 Bertet et al.
